# Supplementary material
Source: PubMed Central journal article supplement (PMC4379991)
Supplement: NIHMS671412-supplement-Supplemental_table_1.pdf [file NIHMS671412-supplement-Supplemental_table_1.pdf]

Spatial relative risk of Autism Spectrum Disorder in Utah

Electronic Supplemental Materials

Table 1. Characteristics of URADD ASD cases and controls broken down by birth cohort and age at surveillance ( $n=28,631$ ).

| Characteristic                | 1994-8 $n(\%)$           |                            |                          | 1998-8 $n(\%)$           |                            |                          |
|-------------------------------|--------------------------|----------------------------|--------------------------|--------------------------|----------------------------|--------------------------|
|                               | Control<br>( $n=2,640$ ) | ASD<br>case<br>( $n=132$ ) | Chi-square<br>$p$ -value | Control<br>( $n=3,560$ ) | ASD<br>case<br>( $n=182$ ) | Chi-square<br>$p$ -value |
| Gender                        |                          |                            | 1                        |                          |                            | .9                       |
| Male                          | 2300(87.1)               | 115(87.1)                  |                          | 3000(84.3)               | 154(84.6)                  |                          |
| Female                        | 340(12.9)                | 17(12.9)                   |                          | 560(15.7)                | 28(15.4)                   |                          |
| Race/ethnicity                |                          |                            | .38                      |                          |                            | .03                      |
| White non-Hispanic            | 2245(85.0)               | 120(90.9)                  |                          | 2866(80.5)               | 163(89.6)                  |                          |
| Hispanic                      | 244(9.2)                 | 9(6.8)                     |                          | 494(13.9)                | 14(7.7)                    |                          |
| Other                         | 98(3.7)                  | 3(2.3)                     |                          | 114(3.2)                 | 4(2.2)                     |                          |
| Missing                       | 53(2.0)                  | 0(0.0)                     |                          | 86(2.4)                  | 1(0.6)                     |                          |
| Maternal age (years)          |                          |                            | .19                      |                          |                            | .48                      |
| <21 years                     | 373(14.1)                | 16(12.1)                   |                          | 497(14.0)                | 27(14.8)                   |                          |
| 21-33 years                   | 1928(73.0)               | 92(69.7)                   |                          | 2597(73.0)               | 126(69.2)                  |                          |
| 34+ years                     | 338(12.8)                | 24(18.2)                   |                          | 466(13.1)                | 29(15.9)                   |                          |
| Missing                       | 1(0.04)                  | 0(0.0)                     |                          | 0(0.0)                   | 0(0.0)                     |                          |
| Paternal age (years)          |                          |                            | .85                      |                          |                            | .66                      |
| <21 years                     | 119(4.5)                 | 5(3.8)                     |                          | 156(4.4)                 | 10(5.5)                    |                          |
| 21-33 years                   | 1770(67.1)               | 88(66.7)                   |                          | 2316(65.1)               | 119(65.4)                  |                          |
| 34+ years                     | 555(21.0)                | 30(22.7)                   |                          | 759(21.3)                | 35(19.2)                   |                          |
| Missing                       | 196(7.4)                 | 9(6.8)                     |                          | 329(9.2)                 | 18(9.9)                    |                          |
| Maternal education<br>(years) |                          |                            | .06                      |                          |                            | .71                      |
| <12 years                     | 298(11.3)                | 15(11.4)                   |                          | 502(14.1)                | 22(12.1)                   |                          |
| 12 or 13 years                | 1151(43.6)               | 44(33.3)                   |                          | 1441(40.5)               | 73(40.1)                   |                          |
| 14+ years                     | 1164(44.1)               | 71(53.8)                   |                          | 1584(44.5)               | 85(46.7)                   |                          |
| Missing                       | 27(1.0)                  | 2(1.5)                     |                          | 33(0.9)                  | 2(1.1)                     |                          |
| Paternal education<br>(years) |                          |                            | .84                      |                          |                            | .58                      |
| <12 years                     | 177(6.7)                 | 11(8.3)                    |                          | 331(9.3)                 | 13(7.1)                    |                          |
| 12 or 13 years                | 826(31.3)                | 36(27.3)                   |                          | 1086(30.5)               | 59(32.4)                   |                          |
| 14+ years                     | 1400(53.0)               | 74(56.1)                   |                          | 1757(49.4)               | 89(48.9)                   |                          |
| Missing                       | 237(9.0)                 | 11(8.3)                    |                          | 386(10.8)                | 21(11.5)                   |                          |

Table 1 continued.

| Characteristic             | 2000-6 <i>n</i> (%)           |                                 |                               | 2000-8 <i>n</i> (%)           |                                 |                               |
|----------------------------|-------------------------------|---------------------------------|-------------------------------|-------------------------------|---------------------------------|-------------------------------|
|                            | Control<br>( <i>n</i> =4,460) | ASD<br>case<br>( <i>n</i> =223) | Chi-square<br><i>p</i> -value | Control<br>( <i>n</i> =5,900) | ASD<br>case<br>( <i>n</i> =295) | Chi-square<br><i>p</i> -value |
| Gender                     |                               |                                 | 1                             |                               |                                 | 1                             |
| Male                       | 3500(78.5)                    | 175(78.5)                       |                               | 4740(80.3)                    | 237(80.3)                       |                               |
| Female                     | 960(21.5)                     | 48(21.5)                        |                               | 1160(19.7)                    | 58(19.7)                        |                               |
| Race/ethnicity             |                               |                                 | .01                           |                               |                                 | .01                           |
| White non-Hispanic         | 3424(76.8)                    | 189(84.8)                       |                               | 4545(77.0)                    | 248(84.1)                       |                               |
| Hispanic                   | 763(17.1)                     | 24(10.8)                        |                               | 984(16.7)                     | 33(11.2)                        |                               |
| Other                      | 154(3.5)                      | 4(1.8)                          |                               | 207(3.5)                      | 6(2.0)                          |                               |
| Missing                    | 119(2.7)                      | 5(2.2)                          |                               | 164(2.8)                      | 8(2.7)                          |                               |
| Maternal age (years)       |                               |                                 | .06                           |                               |                                 | .06                           |
| <21 years                  | 566(12.7)                     | 21(9.4)                         |                               | 755(12.8)                     | 30(10.2)                        |                               |
| 21-33 years                | 3378(75.7)                    | 166(74.4)                       |                               | 4430(75.1)                    | 217(73.6)                       |                               |
| 34+ years                  | 516(11.6)                     | 36(16.1)                        |                               | 715(12.1)                     | 48(16.3)                        |                               |
| Missing                    | 0(0.0)                        | 0(0.0)                          |                               | 0(0.0)                        | 0(0.0)                          |                               |
| Paternal age (years)       |                               |                                 | .08                           |                               |                                 | .23                           |
| <21 years                  | 188(4.2)                      | 3(1.4)                          |                               | 268(4.5)                      | 8(2.7)                          |                               |
| 21-33 years                | 3106(69.6)                    | 154(69.1)                       |                               | 4075(69.1)                    | 198(67.1)                       |                               |
| 34+ years                  | 869(19.5)                     | 49(22.0)                        |                               | 1207(20.5)                    | 67(22.7)                        |                               |
| Missing                    | 297(6.7)                      | 17(7.6)                         |                               | 350(5.9)                      | 22(7.5)                         |                               |
| Maternal education (years) |                               |                                 | .04                           |                               |                                 | .05                           |
| <12 years                  | 668(15.0)                     | 21(9.4)                         |                               | 852(14.4)                     | 31(10.5)                        |                               |
| 12 or 13 years             | 1726(38.7)                    | 100(44.8)                       |                               | 2349(39.8)                    | 135(45.8)                       |                               |
| 14+ years                  | 2001(44.9)                    | 99(44.4)                        |                               | 2620(44.4)                    | 124(42.0)                       |                               |
| Missing                    | 65(1.5)                       | 3(1.4)                          |                               | 79(1.3)                       | 5(1.7)                          |                               |
| Paternal education (years) |                               |                                 | .03                           |                               |                                 | .002                          |
| <12 years                  | 446(10.0)                     | 11(4.9)                         |                               | 593(10.1)                     | 13(4.4)                         |                               |
| 12 or 13 years             | 1326(29.7)                    | 76(34.1)                        |                               | 1831(31.0)                    | 107(36.3)                       |                               |
| 14+ years                  | 2209(49.5)                    | 110(49.3)                       |                               | 2886(48.9)                    | 134(45.4)                       |                               |
| Missing                    | 479(10.7)                     | 26(11.7)                        |                               | 590(10.0)                     | 41(13.9)                        |                               |

Table 1 continued.

| Characteristic                | 2002-4 <i>n</i> (%)           |                                 |                               | 2002-6 <i>n</i> (%)           |                                 |                               | 2004-4 <i>n</i> (%)           |                                 |                               |
|-------------------------------|-------------------------------|---------------------------------|-------------------------------|-------------------------------|---------------------------------|-------------------------------|-------------------------------|---------------------------------|-------------------------------|
|                               | Control<br>( <i>n</i> =3,320) | ASD<br>case<br>( <i>n</i> =166) | Chi-square<br><i>p</i> -value | Control<br>( <i>n</i> =5,780) | ASD<br>case<br>( <i>n</i> =289) | Chi-square<br><i>p</i> -value | Control<br>( <i>n</i> =3,720) | ASD<br>case<br>( <i>n</i> =186) | Chi-square<br><i>p</i> -value |
| Gender                        |                               |                                 | 1                             |                               |                                 | 1                             |                               |                                 | 1                             |
| Male                          | 2680(80.7)                    | 134(80.7)                       |                               | 4660<br>(80.6)                | 233(80.6)                       |                               | 2960(79.6)                    | 148(79.6)                       |                               |
| Female                        | 640(19.3)                     | 32(19.3)                        |                               | 1120(19.4)                    | 56(19.4)                        |                               | 760(20.4)                     | 38(20.4)                        |                               |
| Race/ethnicity                |                               |                                 | .7                            |                               |                                 | .67                           |                               |                                 | .08                           |
| White non-Hispanic            | 2486(74.9)                    | 128(78.1)                       |                               | 4293(74.3)                    | 219(75.8)                       |                               | 2764(74.3)                    | 144(77.4)                       |                               |
| Hispanic                      | 614(18.5)                     | 30(18.3)                        |                               | 1051(18.2)                    | 54(18.7)                        |                               | 680(18.3)                     | 36(19.4)                        |                               |
| Other                         | 165(5.0)                      | 6(3.66)                         |                               | 329(5.7)                      | 13(4.5)                         |                               | 197(5.3)                      | 3(1.6)                          |                               |
| Missing                       | 55(1.7)                       | 0(0.0)                          |                               | 107(1.9)                      | 3(1.0)                          |                               | 79(2.1)                       | 3(1.6)                          |                               |
| Maternal age (years)          |                               |                                 | .26                           |                               |                                 | .5                            |                               |                                 | .37                           |
| <21 years                     | 376(11.3)                     | 14(8.54)                        |                               | 648(11.2)                     | 30(10.4)                        |                               | 343(9.2)                      | 12(6.5)                         |                               |
| 21-33 years                   | 2556(77.0)                    | 127(77.4)                       |                               | 4405(76.2)                    | 216(74.7)                       |                               | 2944(79.1)                    | 149(80.1)                       |                               |
| 34+ years                     | 388(11.7)                     | 25(15.2)                        |                               | 727(12.6)                     | 43(14.9)                        |                               | 433(11.6)                     | 25(13.4)                        |                               |
| Missing                       | 0(0.0)                        | 0(0.0)                          |                               | 0(0.0)                        | 0(0.0)                          |                               | 0(0.0)                        | 0(0.0)                          |                               |
| Paternal age (years)          |                               |                                 | .61                           |                               |                                 | .64                           |                               |                                 | .71                           |
| <21 years                     | 129(3.9)                      | 5(3.1)                          |                               | 233(4.0)                      | 9(3.1)                          |                               | 96(2.6)                       | 5(2.7)                          |                               |
| 21-33 years                   | 2348(70.7)                    | 120(73.2)                       |                               | 3953(68.4)                    | 197(68.2)                       |                               | 2634(70.8)                    | 130(69.9)                       |                               |
| 34+ years                     | 658(19.8)                     | 28(17.1)                        |                               | 1248(21.6)                    | 56(19.4)                        |                               | 731(19.7)                     | 42(22.6)                        |                               |
| Missing                       | 185(5.6)                      | 11(6.7)                         |                               | 346(6.0)                      | 27(9.3)                         |                               | 259(7.0)                      | 9(4.8)                          |                               |
| Maternal education<br>(years) |                               |                                 | .22                           |                               |                                 | .01                           |                               |                                 | .002                          |
| <12 years                     | 483(14.6)                     | 16(9.8)                         |                               | 820(14.2)                     | 29(10.0)                        |                               | 500(13.4)                     | 9(4.8)                          |                               |
| 12 or 13 years                | 1323(39.9)                    | 70(42.7)                        |                               | 2227(38.5)                    | 134(46.4)                       |                               | 1389(37.3)                    | 82(44.1)                        |                               |
| 14+ years                     | 1476(44.5)                    | 78(47.6)                        |                               | 2675(46.3)                    | 123(42.6)                       |                               | 1768(47.5)                    | 93(50.0)                        |                               |
| Missing                       | 38(1.1)                       | 2(1.2)                          |                               | 58(1.0)                       | 3(1.0)                          |                               | 63(1.7)                       | 2(1.1)                          |                               |

Paternal education  
(years)

|                |            |          |     |            |           |     |            |          |     |
|----------------|------------|----------|-----|------------|-----------|-----|------------|----------|-----|
|                |            |          | .05 |            |           | .13 |            |          | .05 |
| <12 years      | 374(11.3)  | 10(6.1)  |     | 587(10.2)  | 24(8.3)   |     | 368(9.9)   | 9(4.8)   |     |
| 12 or 13 years | 1003(30.2) | 59(36.0) |     | 1747(30.2) | 99(34.3)  |     | 1082(29.1) | 63(33.9) |     |
| 14+ years      | 1645(49.6) | 76(46.3) |     | 2922(50.6) | 129(44.6) |     | 1898(51.0) | 97(52.2) |     |
| Missing        | 298(9.0)   | 21(12.8) |     | 524(9.1)   | 37(12.8)  |     | 372(10.0)  | 17(9.1)  |     |

---
